# Supplementary material for: Insight into the Taxonomic Resolution of Apiospora: Introducing Novel Species and Records from Bamboo in China and Thailand
Source: MDPI journal article supplement (doi:10.3390/d14110918), 2022-10-27
Supplement: s1 [file s1]

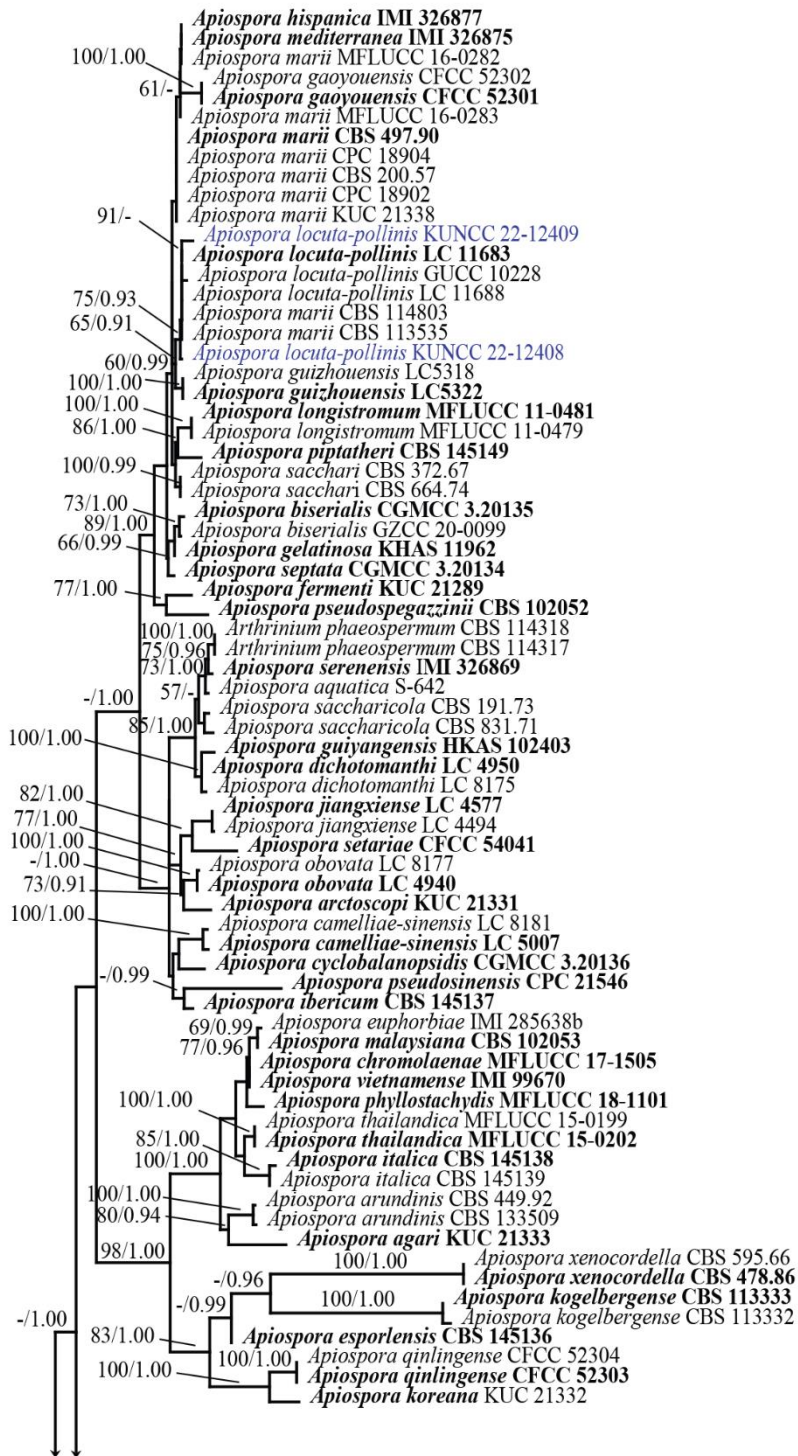

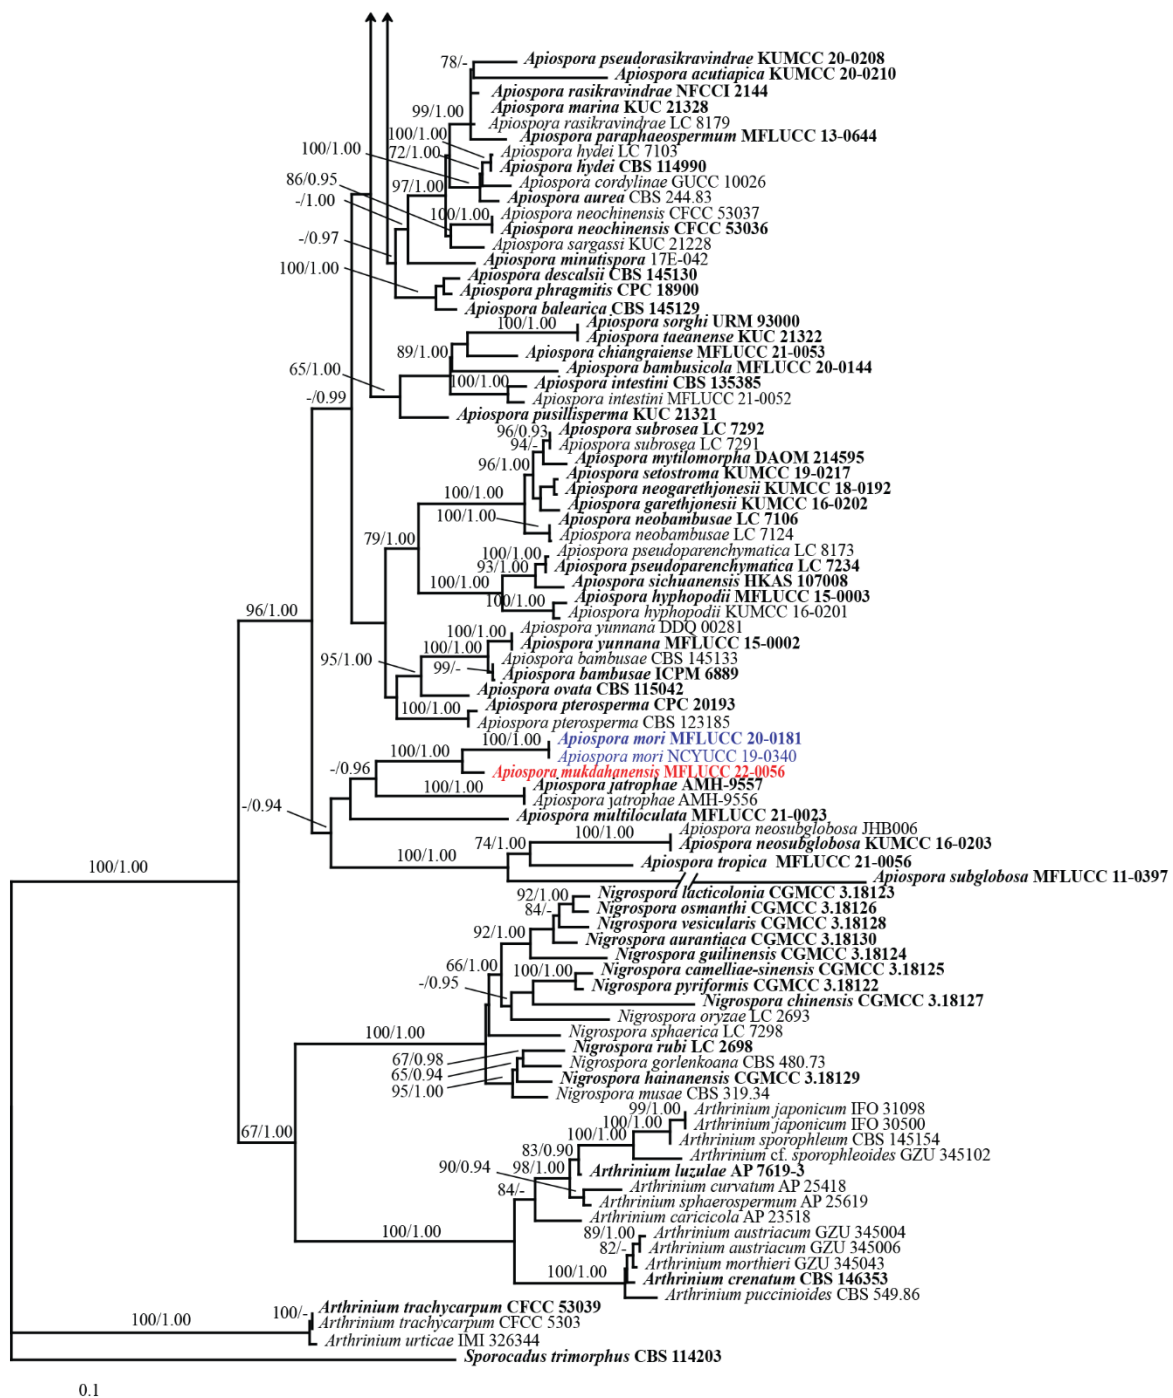

**Figure S1.** Phylogenetic tree retrieved from RAxML analyses of a combined ITS, LSU and TEF1- $\alpha$  sequence data of *Apiospora*, and other related taxa in the family *Apiosporaceae*. Bootstrap support values for ML equal or greater than 60% and Bayesian posterior probabilities greater than 0.90 are indicated at the nodes as ML/PP. The ex-type strains are in bold. The new species are in red and new record and new combination species are in blue. The tree is rooted to *Sporocadus trimorphus* (CBS 114203).
